# Supplementary material for: Plaque Size Tool: an automated plaque analysis tool for simplifying and standardising bacteriophage plaque morphology measurements
Source: bioRxiv or medRxiv preprint supplement (doi:10.1101/2021.04.12.439404), 2021-04-12

# Supplemental Material

## **Plaque Size Tool: an automated plaque analysis tool for simplifying and standardising bacteriophage plaque morphology measurements**

Ellina Trofimova<sup>1</sup> and Paul R Jaschke<sup>1</sup>

Affiliations:

<sup>1</sup> Department of Molecular Sciences, Macquarie University, Balaclava Rd, Macquarie Park NSW 2109, Australia

\*Correspondence and requests for materials should be addressed to PRJ  
([paul.jaschke@mq.edu.au](mailto:paul.jaschke@mq.edu.au))

### CONTENTS

#### SUPPORTING TABLES

Table S1:  $\Phi$ X174 Petri dish image characteristics

Table S2: Image characteristics of additional phage plates from Actinobacteriophage database

Table S3: Original and Plaque Size Tool processed  $\Phi$ X174 Petri dish images

#### SUPPORTING FILES

File S1: Plaque Size Tool User Manual

**Table S1. ΦX174 Petri dish image characteristics.**

| <b>Image name</b> | <b>PST flag</b> | <b>Resolution (DPI)</b> | <b>Image size (pixels × pixels)</b> | <b>Average Plaque Size (mm)</b> | <b>Plaque number (manual count)</b> | <b>Plaque number (PST)</b> | <b>False positive plaques</b> | <b>Incorrect plaques</b> | <b>PST correct plaques (overall)</b> | <b>PST accuracy (%)</b> |
|-------------------|-----------------|-------------------------|-------------------------------------|---------------------------------|-------------------------------------|----------------------------|-------------------------------|--------------------------|--------------------------------------|-------------------------|
| Plate_1.tif       | small           | 600                     | 2811 x 2100                         | 1.22±0.27                       | 45                                  | 44                         | 3                             | 0                        | 41                                   | 91.11                   |
| Plate_2.tif       | none            | 600                     | 2811 x 2100                         | 5.17±0.38                       | 17                                  | 19                         | 0                             | 4                        | 15                                   | 88.24                   |
| Plate_3.tif       | none            | 600                     | 2811 x 2100                         | 3.06±0.60                       | 51                                  | 51                         | 2                             | 1                        | 48                                   | 94.12                   |
| Plate_4.tif       | none            | 600                     | 2811 x 2100                         | 3.22±0.36                       | 11                                  | 10                         | 0                             | 0                        | 10                                   | 90.91                   |
| Plate_5.tif       | none            | 600                     | 2811 x 2100                         | 2.93±0.45                       | 57                                  | 51                         | 1                             | 0                        | 50                                   | 87.72                   |
| Plate_6.tif       | none            | 600                     | 2811 x 2100                         | 3.53±1.01                       | 47                                  | 48                         | 0                             | 3                        | 45                                   | 95.74                   |
| Plate_7.tif       | none            | 600                     | 2811 x 2100                         | 2.51±0.35                       | 26                                  | 25                         | 0                             | 0                        | 25                                   | 96.15                   |
| Plate_8.tif       | none            | 300                     | 1606 x 1200                         | 5.14±1.20                       | 19                                  | 19                         | 0                             | 0                        | 19                                   | 100.00                  |
| Plate_9.tif       | small           | 300                     | 1606 x 1200                         | 1.96±0.57                       | 41                                  | 45                         | 5                             | 0                        | 40                                   | 97.56                   |
| Plate_10.tif      | none            | 300                     | 1606 x 1200                         | 5.79±0.90                       | 23                                  | 25                         | 1                             | 5                        | 19                                   | 82.61                   |
| Plate_11.tif      | small           | 300                     | 1606 x 1200                         | 1.25±0.29                       | 53                                  | 38                         | 1                             | 2                        | 35                                   | 66.04                   |
| Plate_12.tif      | none            | 300                     | 1606 x 1200                         | 4.45±0.61                       | 15                                  | 12                         | 0                             | 0                        | 12                                   | 80.00                   |
| Plate_13.tif      | small           | 300                     | 1606 x 1200                         | 1.34±0.33                       | 66                                  | 37                         | 3                             | 0                        | 34                                   | 51.52                   |
| Plate_14.tif      | none            | 300                     | 1606 x 1200                         | 5.85±0.51                       | 17                                  | 17                         | 0                             | 5                        | 12                                   | 70.59                   |
| Plate_15.tif      | small           | 300                     | 1606 x 1200                         | 2.14±0.76                       | 49                                  | 36                         | 0                             | 0                        | 36                                   | 73.47                   |
| Plate_16.tif      | small           | 300                     | 1606 x 1200                         | 2.16±0.72                       | 48                                  | 46                         | 1                             | 0                        | 45                                   | 93.75                   |
| Plate_17.tif      | small           | 300                     | 1606 x 1200                         | 1.99±0.91                       | 16                                  | 17                         | 3                             | 0                        | 14                                   | 87.50                   |

Columns: 'False positive plaques' - additional incorrect objects that were detected on a plate as plaques (bubbles, dark spots and etc.). 'Incorrect plaques' - plaques that were measured inaccurately (merged plaques, a partial selection of a plaque, larger/smaller plaque size). 'PST correct plaques (overall)' - The overall plaque number calculated by PST ('Plaque number (PST)) minus 'False positive plaques' and 'Incorrect plaques'.

**Table S2. Image characteristics of additional phage plates from Actinobacteriophage database.**

| Phage name                     | File URL                                                                                                                                        | Dimensions  | DPI | File Format | Image colour | Device              | PST flags | Plaque number (manual count) | Plaque number (PST) | Correctly detected plaques (%) |
|--------------------------------|-------------------------------------------------------------------------------------------------------------------------------------------------|-------------|-----|-------------|--------------|---------------------|-----------|------------------------------|---------------------|--------------------------------|
| Mycobacterium phage DS6A       | <a href="https://phagesdb.org/media/plaquePics/2001-07-23_DS6A_on_BCG.jpg">https://phagesdb.org/media/plaquePics/2001-07-23_DS6A_on_BCG.jpg</a> | 624 × 462   | 72  | JPG         | greyscale    | unknown             | small     | 25                           | 23                  | 92.00                          |
| Streptomyces phage Aaronocolus | <a href="https://phagesdb.org/media/plaquePics/Aaronocolus_Plaque_2.jpg">https://phagesdb.org/media/plaquePics/Aaronocolus_Plaque_2.jpg</a>     | 1360 × 1024 | 72  | JPG         | greyscale    | unknown             | small     | 37                           | 31                  | 83.78                          |
| Mycobacterium phage Durfee     | <a href="https://phagesdb.org/media/plaquePics/Durfee_Plaque.png">https://phagesdb.org/media/plaquePics/Durfee_Plaque.png</a>                   | 413 × 310   | 150 | PNG         | greyscale    | unknown             | small     | 18                           | 13                  | 72.22                          |
| Arthrobacter phage Nitro       | <a href="https://phagesdb.org/media/plaquePics/Nitro_Plaque.JPG">https://phagesdb.org/media/plaquePics/Nitro_Plaque.JPG</a>                     | 3024 × 4032 | 72  | JPEG        | colour       | mobile phone camera | none      | 10                           | 10                  | 100.00                         |
| Arthrobacter phage Rizwana     | <a href="https://phagesdb.org/media/plaquePics/Rizwana_Plaque.jpg">https://phagesdb.org/media/plaquePics/Rizwana_Plaque.jpg</a>                 | 2814 × 2825 | 72  | JPG         | colour       | mobile phone camera | small     | 22                           | 12                  | 54.55                          |
| Mycobacterium phage Thresher   | <a href="https://phagesdb.org/media/plaquePics/Thresher_Plaque.jpg">https://phagesdb.org/media/plaquePics/Thresher_Plaque.jpg</a>               | 1836 × 3264 | 72  | JPG         | colour       | mobile phone camera | none      | 13                           | 12                  | 92.31                          |
| Streptomyces phage Katalie     | <a href="https://phagesdb.org/media/plaquePics/Katalie_Plaque.png">https://phagesdb.org/media/plaquePics/Katalie_Plaque.png</a>                 | 646 × 626   | 144 | PNG         | colour       | unknown             | small     | 25                           | 22                  | 88.00                          |
| Gordonia phage Anaysia         | <a href="https://phagesdb.org/media/plaquePics/Anaysia_Plaque_dMih9qg.jpg">https://phagesdb.org/media/plaquePics/Anaysia_Plaque_dMih9qg.jpg</a> | 3024 × 3024 | 72  | JPG         | colour       | mobile phone camera | none      | 23                           | 22                  | 95.65                          |

**Table S3. Original and Plaque Size Tool processed  $\Phi$ X174 Petri dish images**

| Plate name  | Original image (TIFF)                                                              | Plaque Size Tool output image                                                       |
|-------------|------------------------------------------------------------------------------------|-------------------------------------------------------------------------------------|
| Plate_1.tif | 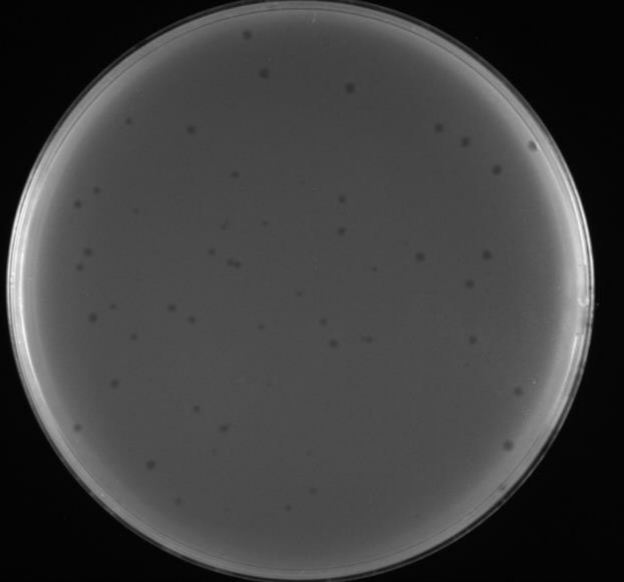 |  |

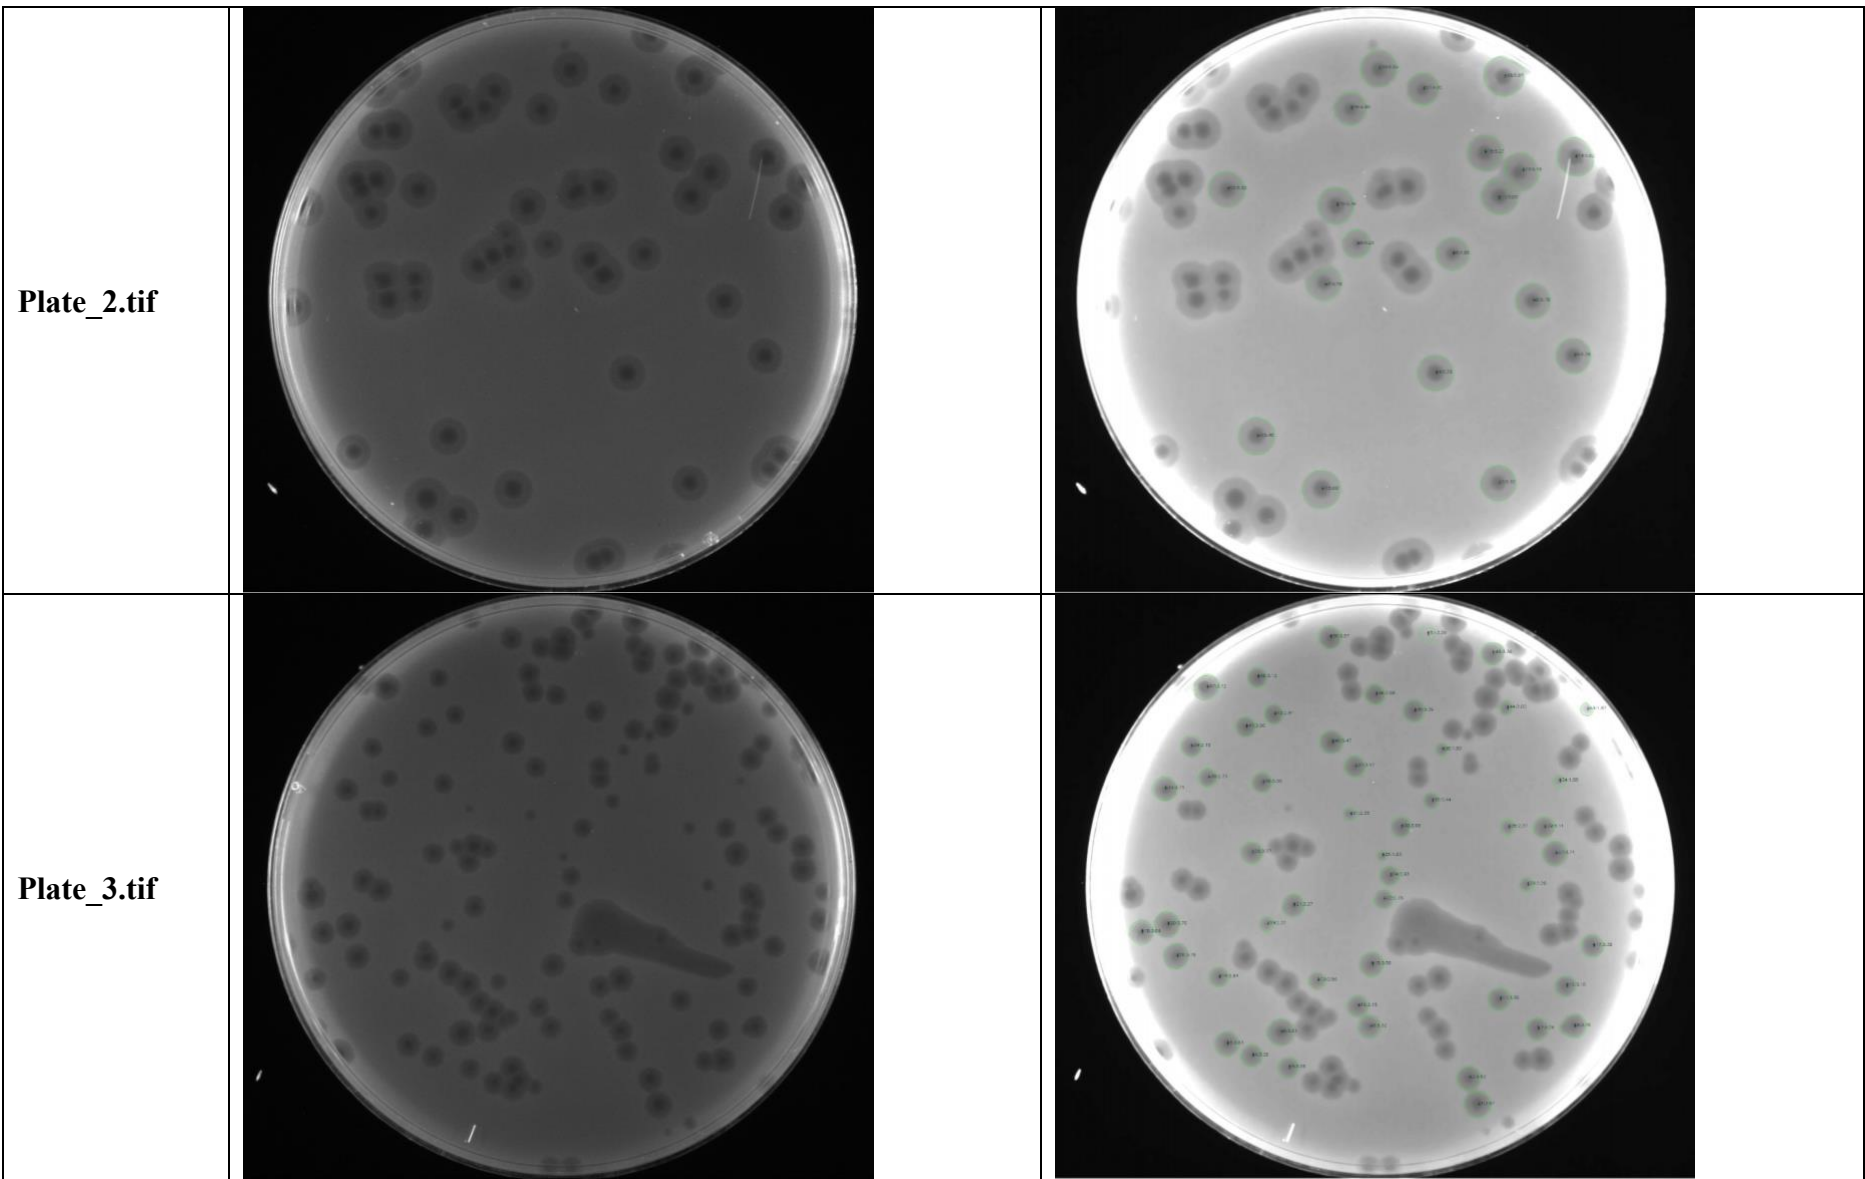

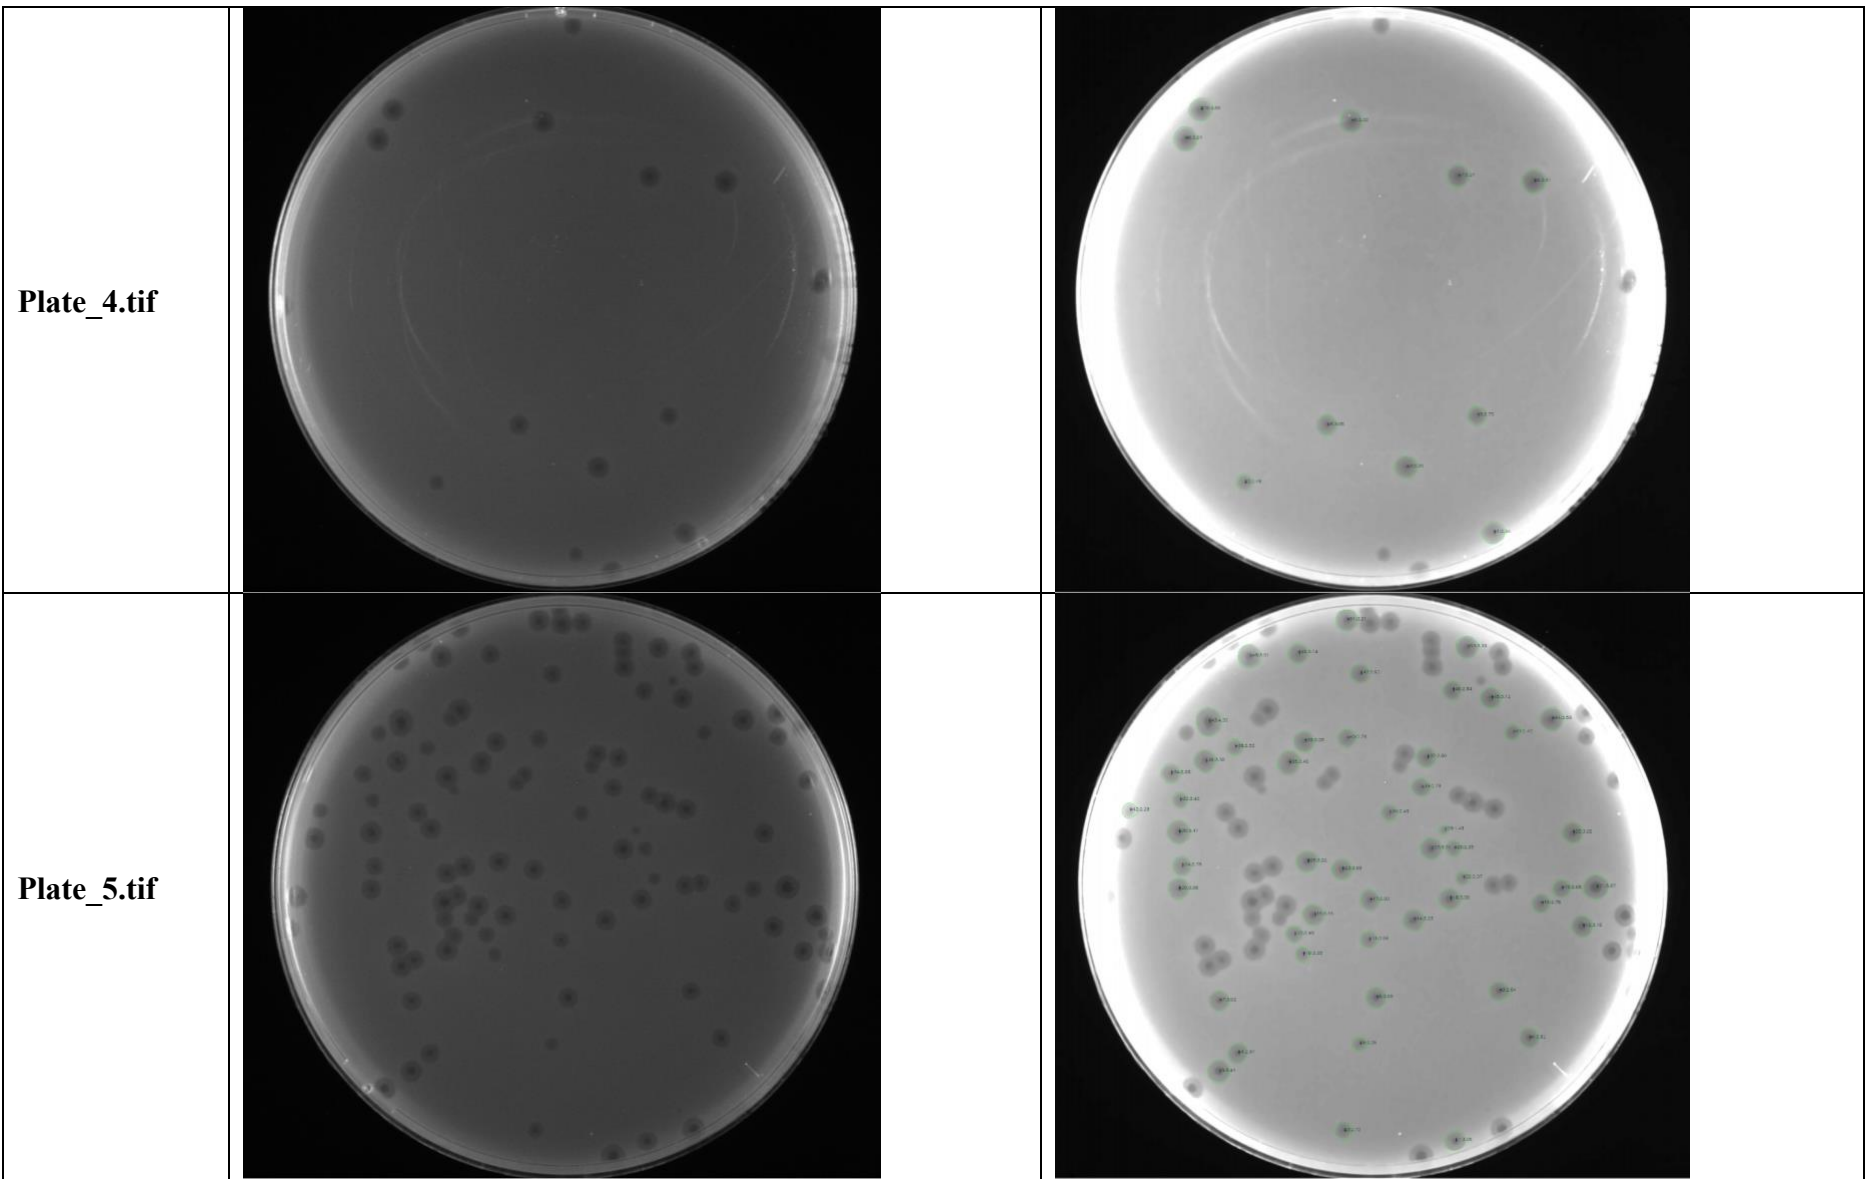

**Plate\_6.tif**

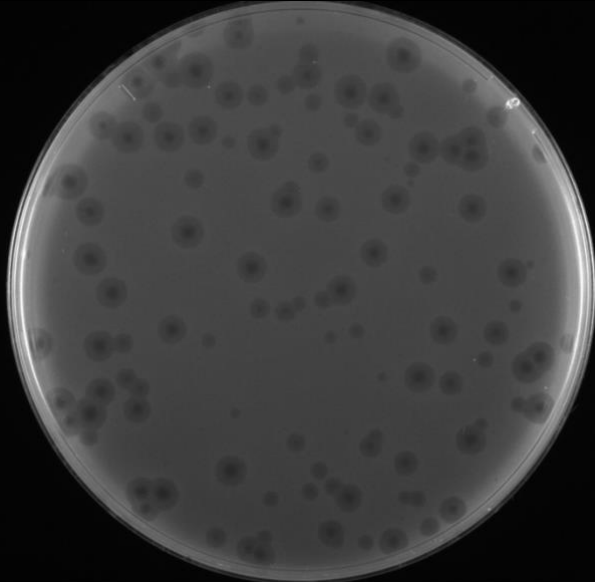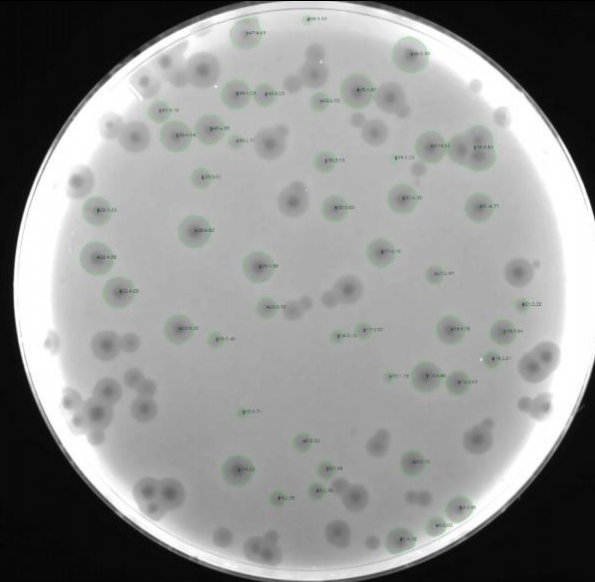

**Plate\_7.tif**

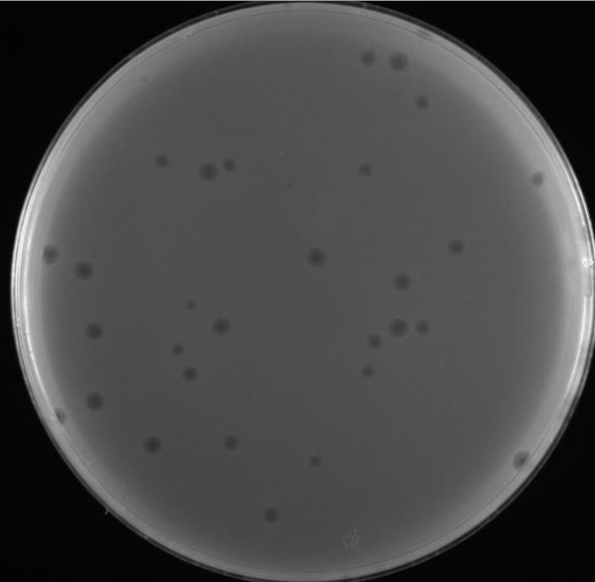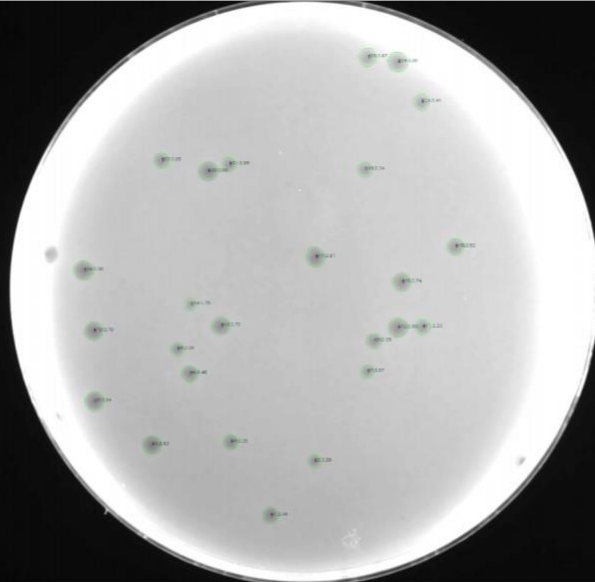

Plate\_8.tif

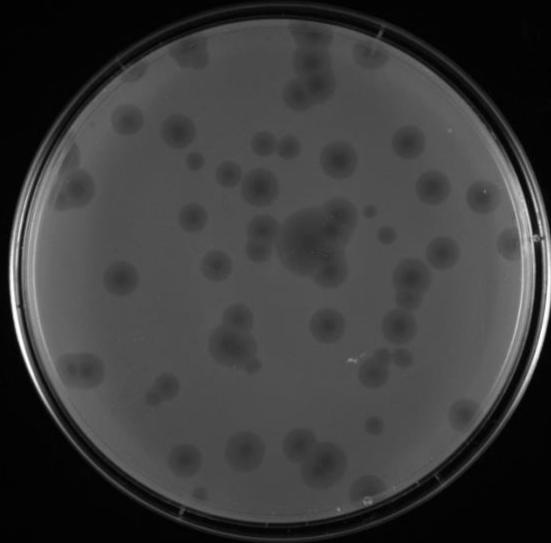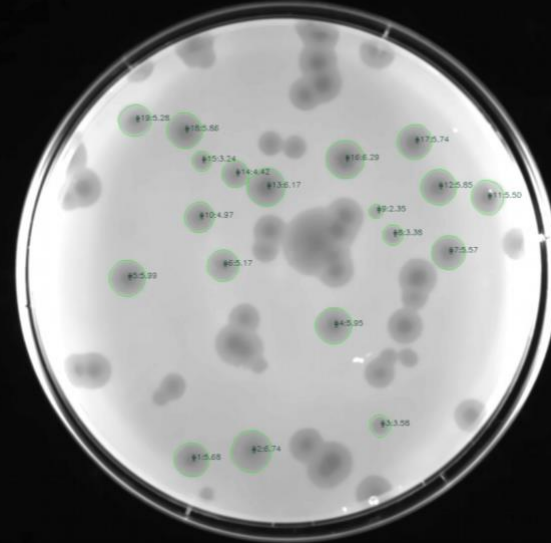

Plate\_9.tif

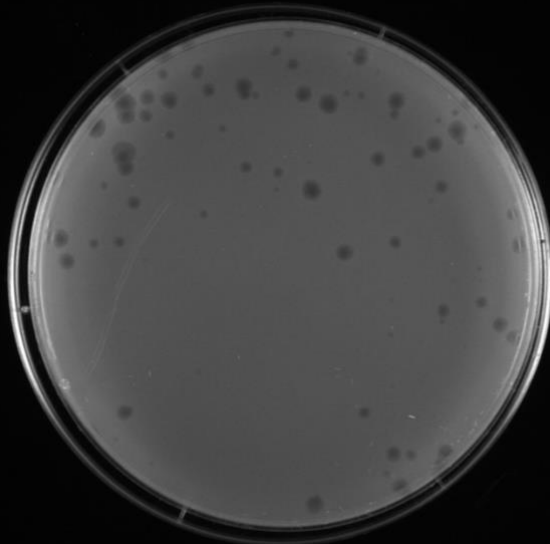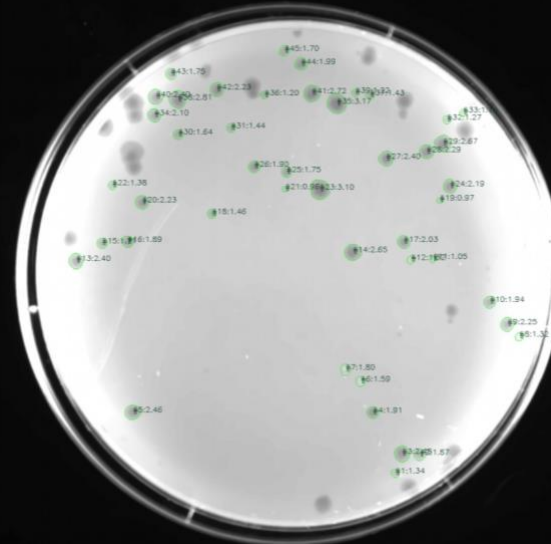





Plate\_12.tif

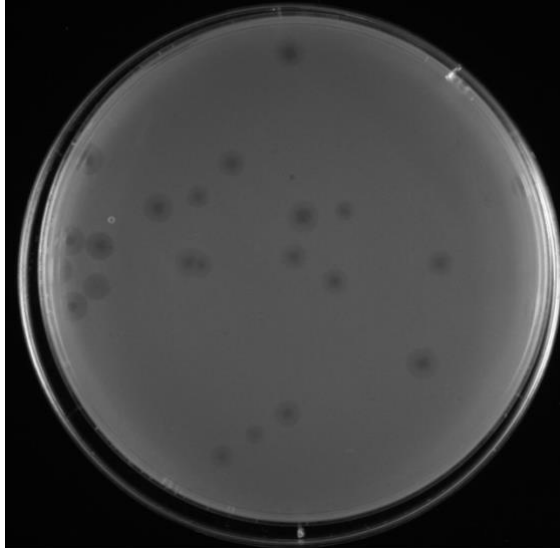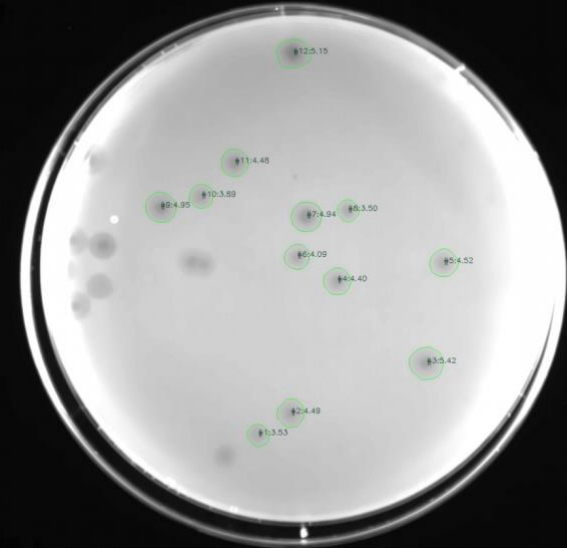

Plate\_13.tif

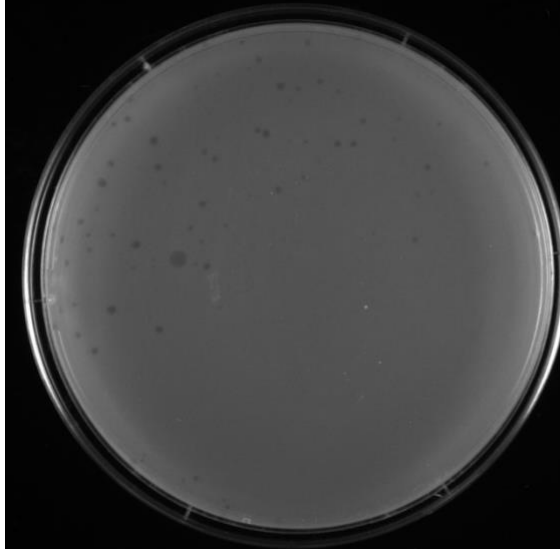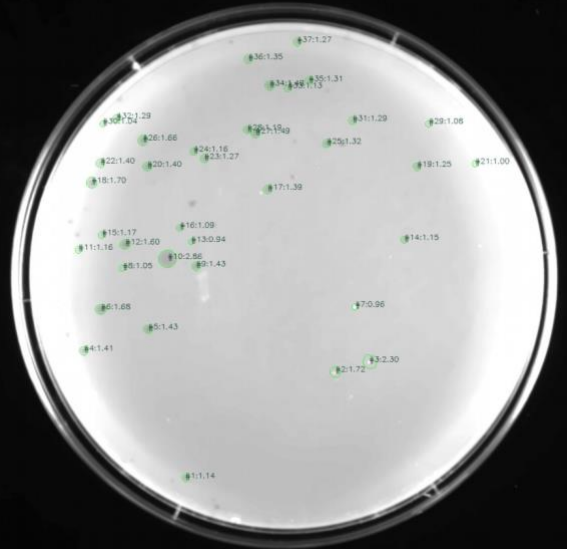



Plate\_16.tif

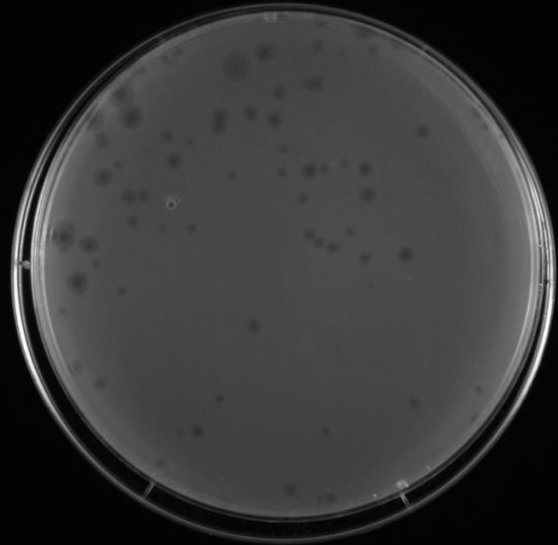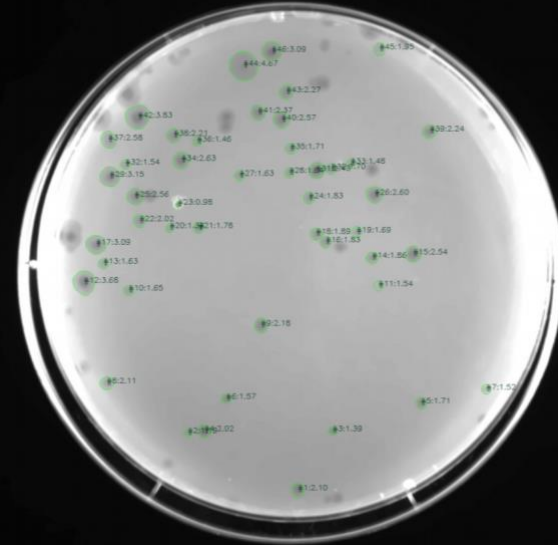

Plate\_17.tif

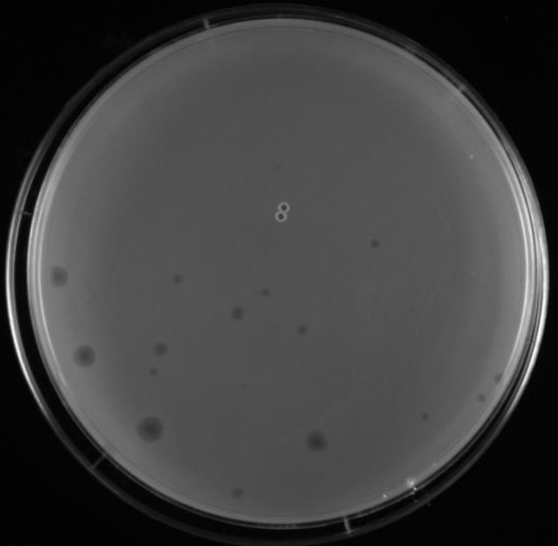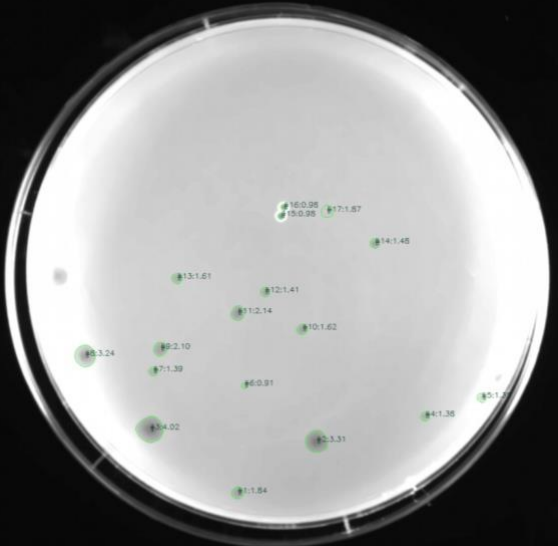

Supplement: Supplementary file [file media-1.pdf]
