# Supplementary material for: Plaque Size Tool: an automated plaque analysis tool for simplifying and standardising bacteriophage plaque morphology measurements
Source: bioRxiv or medRxiv preprint supplement (doi:10.1101/2021.04.12.439404), 2021-04-12
Supplement: Supplementary file [file media-2.pdf]

# Plaque Size Tool User Manual

## Table of Contents

|                                               |          |
|-----------------------------------------------|----------|
| <b>1. INTRODUCTION.....</b>                   | <b>1</b> |
| <b>2. PREREQUISITES INSTALLATION .....</b>    | <b>2</b> |
| 2.1 PYTHON INSTALLATION .....                 | 3        |
| 2.2 PIP3 INSTALLATION .....                   | 5        |
| <b>3. PLAQUE SIZE TOOL INSTALLATION .....</b> | <b>6</b> |
| 3.1 GITHUB ARCHIVE DOWNLOAD .....             | 6        |
| 3.2 INSTALLATION USING PIP .....              | 6        |
| <b>4. PLAQUE SIZE TOOL USAGE.....</b>         | <b>7</b> |
| 4.1 PLAQUE SIZE TOOL USAGE OPTIONS .....      | 7        |
| 4.2 SINGLE FILE PROCESSING.....               | 9        |
| EXAMPLES.....                                 | 8        |
| 4.3 BATCH FILES PROCESSING .....              | 10       |
| EXAMPLE .....                                 | 10       |
| 4.4 OUTPUT FILES.....                         | 11       |

## 1. Introduction

Plaque Size Tool is an open-source application written in Python 3 that is able to detect and measure bacteriophage plaques on a Petri dish image.

The source files are located at [https://github.com/ellinium/plaque\\_size\\_tool](https://github.com/ellinium/plaque_size_tool).

The tool can be installed on any operation system supporting Python.

The installation guide is provided for two most frequently used OS – Windows and MacOS.

To execute installation commands on Mac use ‘Terminal’ or any other command line interpreter (CLI) preferred, on Windows use ‘Command Prompt’ (or any other CLI preferred).

The CLI screenshots taken for this manual were made on macOS High Sierra and Windows 10.

Plaque size tool was tested on the Python versions 3.7, 3.8 and 3.9.4, and if you are experiencing any problems with the higher versions, please send an email with the error to [ellina.trofimova@hdr.mq.edu.au](mailto:ellina.trofimova@hdr.mq.edu.au) or create an issue at [https://github.com/ellinium/plaque\\_size\\_tool/issues](https://github.com/ellinium/plaque_size_tool/issues) (requires registration on GitHub).

## 2. Prerequisites installation

*Python 3.6* or higher and *pip3* should be installed on the system.

It is possible to test whether they are installed on your OS by executing a command in Terminal (macOS) or Command Prompt (Windows):

MacOS: execute `python3 --version`

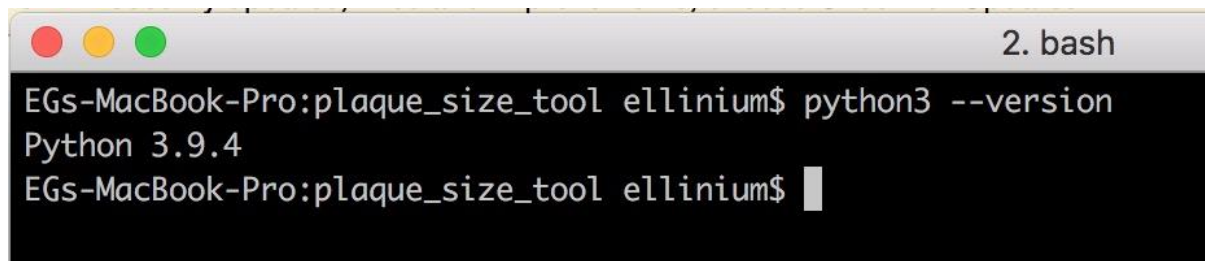

```
2. bash
EGs-MacBook-Pro:plaque_size_tool ellinium$ python3 --version
Python 3.9.4
EGs-MacBook-Pro:plaque_size_tool ellinium$
```

Windows: execute `py --version`

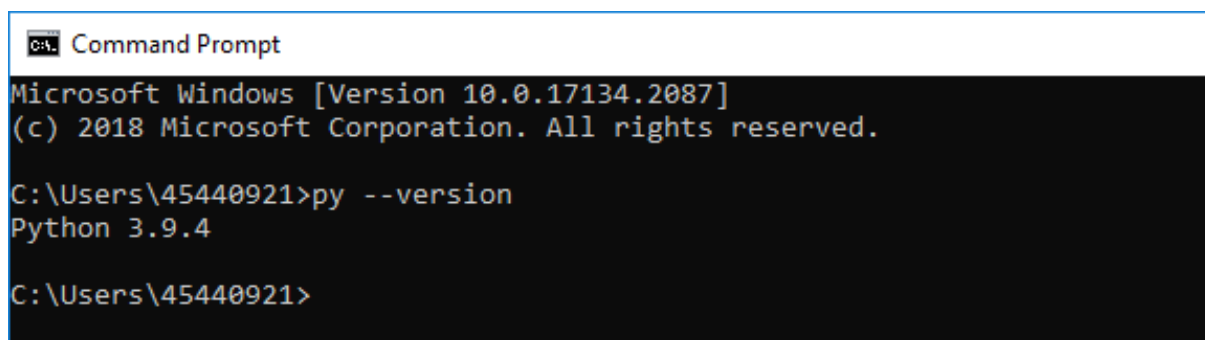

```
Command Prompt
Microsoft Windows [Version 10.0.17134.2087]
(c) 2018 Microsoft Corporation. All rights reserved.

C:\Users\45440921>py --version
Python 3.9.4

C:\Users\45440921>
```

*pip3* should be installed on the system.

Pip3 is usually already installed on your system if you are using Python 3.6 or higher. To check whether it is installed or not, execute the command `pip3` in your CLI (the same command is used both for Windows and MacOS).

```
2. bash
(base) EGs-MacBook-Pro:~ ellinium$ pip3

Usage:
  pip3 <command> [options]

Commands:
  install          Install packages.
  download         Download packages.
```

## 2.1 Python installation

If Python3 is not found in your system, please navigate to <https://www.python.org/downloads/>.

On the main page there is a link to the latest version of Python3 depending on your OS.

MacOS:

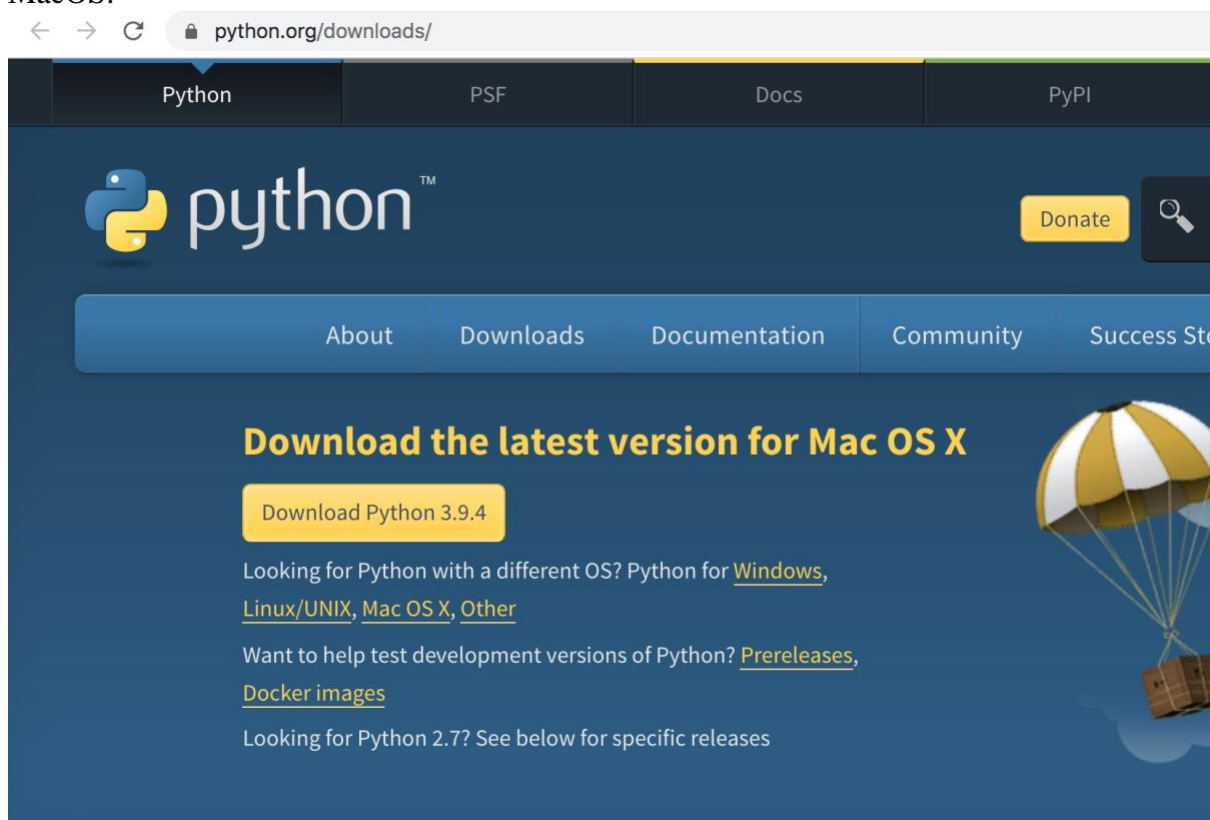

Windows:

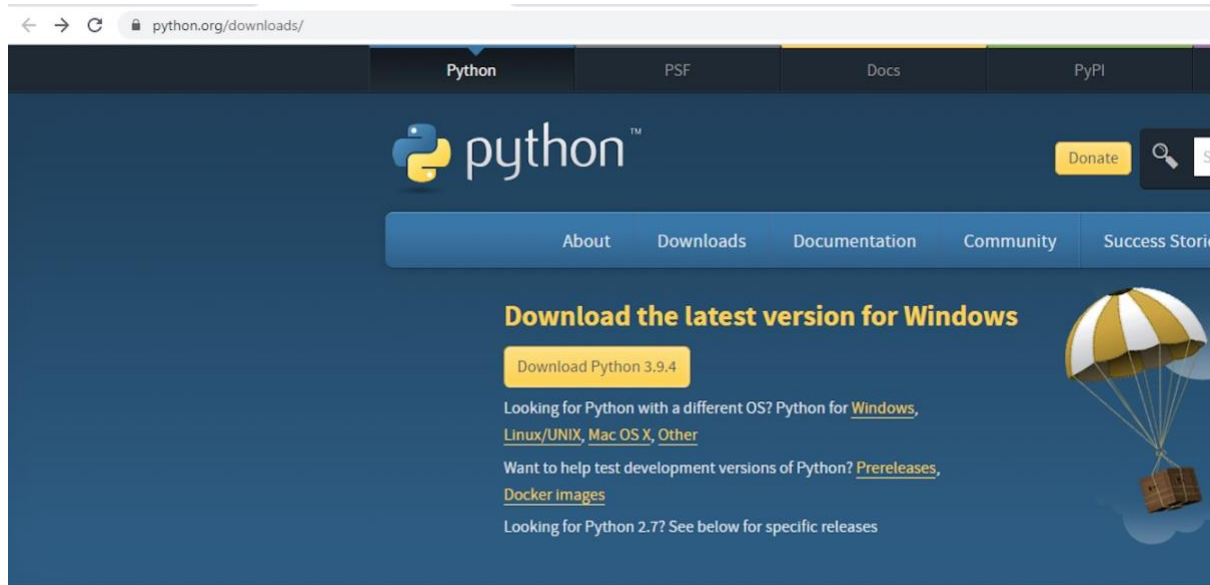

Install the latest version of Python by clicking ‘**Download Python <latest version>**’ and running the downloaded package.

The detailed instructions for Python download and installation are also provided at <https://wiki.python.org/moin/BeginnersGuide/Download>.

After Python installation, check that Python3 and pip3 were installed properly by executing the same commands as above:

MacOS:

```
python3 --version
```

```
pip3
```

Windows:

```
py --version
```

```
pip3
```

## 2.2 Pip3 installation

If Python3 is installed in your system but *pip3* is missing, it is possible to install it separately.

For that, navigate to <https://pip.pypa.io/en/stable/installing/> and the section 'Installing with get-pip.py'.

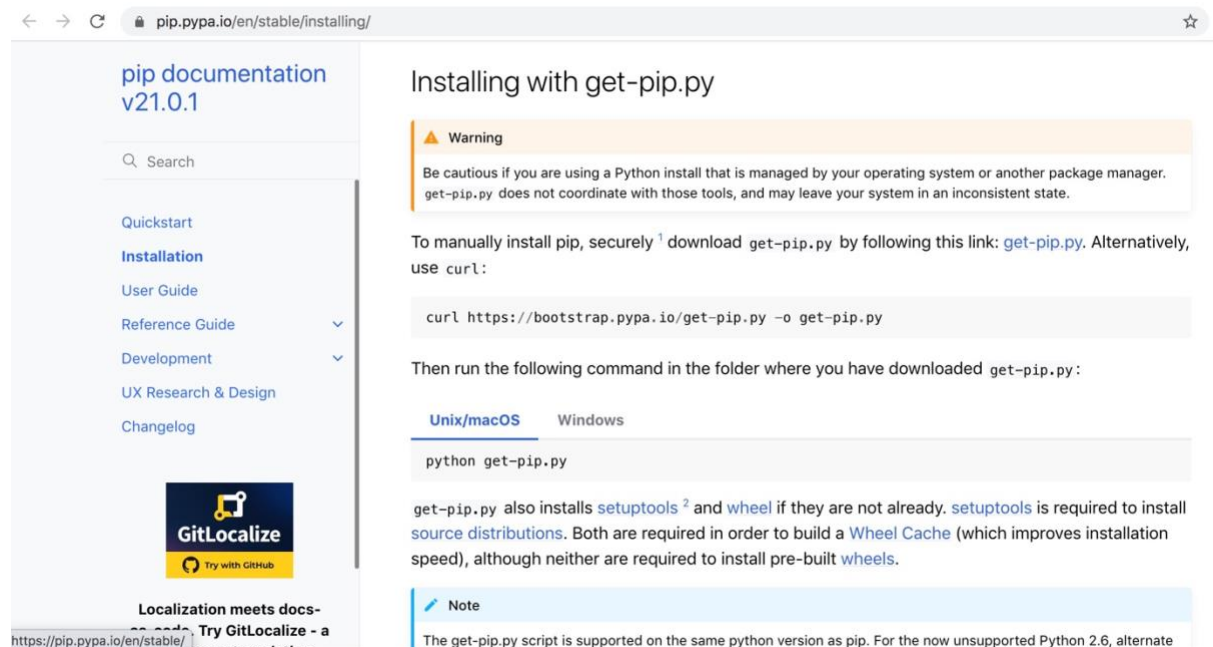

The screenshot shows the pip documentation page for installing with `get-pip.py`. The page title is "Installing with get-pip.py". A warning box states: "Warning: Be cautious if you are using a Python install that is managed by your operating system or another package manager. get-pip.py does not coordinate with those tools, and may leave your system in an inconsistent state." The instructions are: "To manually install pip, securely<sup>1</sup> download get-pip.py by following this link: [get-pip.py](#). Alternatively, use curl:" followed by the command: `curl https://bootstrap.pypa.io/get-pip.py -o get-pip.py`. Then run the following command in the folder where you have downloaded get-pip.py: `python get-pip.py`. A note at the bottom states: "The get-pip.py script is supported on the same python version as pip. For the now unsupported Python 2.6, alternate".

Execute the following command to download `get-pip.py` file:

MacOS: `python3 get-pip.py`

Windows: `py get-pip.py`

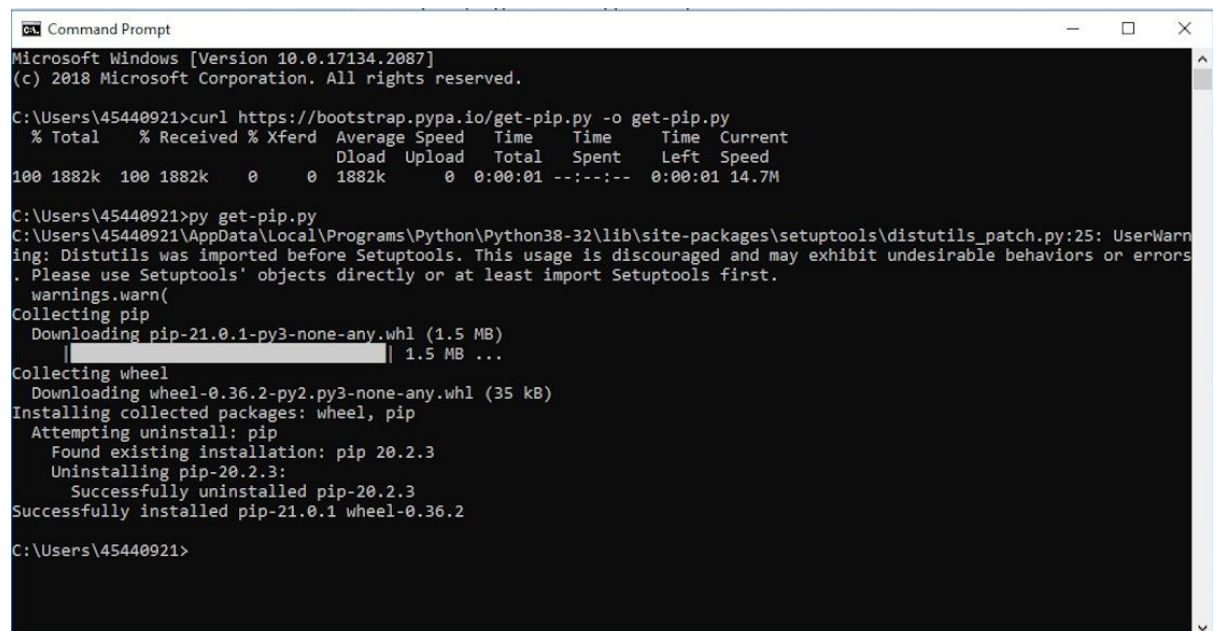

```
Microsoft Windows [Version 10.0.17134.2087]
(c) 2018 Microsoft Corporation. All rights reserved.

C:\Users\45440921>curl https://bootstrap.pypa.io/get-pip.py -o get-pip.py
  % Total    % Received % Xferd  Average Speed   Time    Time     Time  Current
                                 Dload  Upload   Total   Spent    Left   Speed
100 1882k  100 1882k    0     0 1882k    0  0:00:01 --:--:--  0:00:01 14.7M

C:\Users\45440921>py get-pip.py
C:\Users\45440921\AppData\Local\Programs\Python\Python38-32\lib\site-packages\setuptools\distutils_patch.py:25: UserWarning: Distutils is imported before Setuptools. This usage is discouraged and may exhibit undesirable behaviors or errors. Please use Setuptools' objects directly or at least import Setuptools first.
  warnings.warn(
Collecting pip
  Downloading pip-21.0.1-py3-none-any.whl (1.5 MB)
    |#####| 1.5 MB ...
Collecting wheel
  Downloading wheel-0.36.2-py2.py3-none-any.whl (35 kB)
Installing collected packages: wheel, pip
  Attempting uninstall: pip
    Found existing installation: pip 20.2.3
    Uninstalling pip-20.2.3:
      Successfully uninstalled pip-20.2.3
Successfully installed pip-21.0.1 wheel-0.36.2

C:\Users\45440921>
```

If `pip3` is installed but outdated, please upgrade it by executing the following command:

MacOS: `python3 -m pip install --upgrade pip`  
Windows: `py -m pip install --upgrade pip`

## 3. Plaque Size Tool installation

### 3.1 GitHub archive download

Navigate to [https://github.com/ellinium/plaque\\_size\\_tool](https://github.com/ellinium/plaque_size_tool). After that, click the green button 'Code' in the right corner and select the option 'Download Zip'.

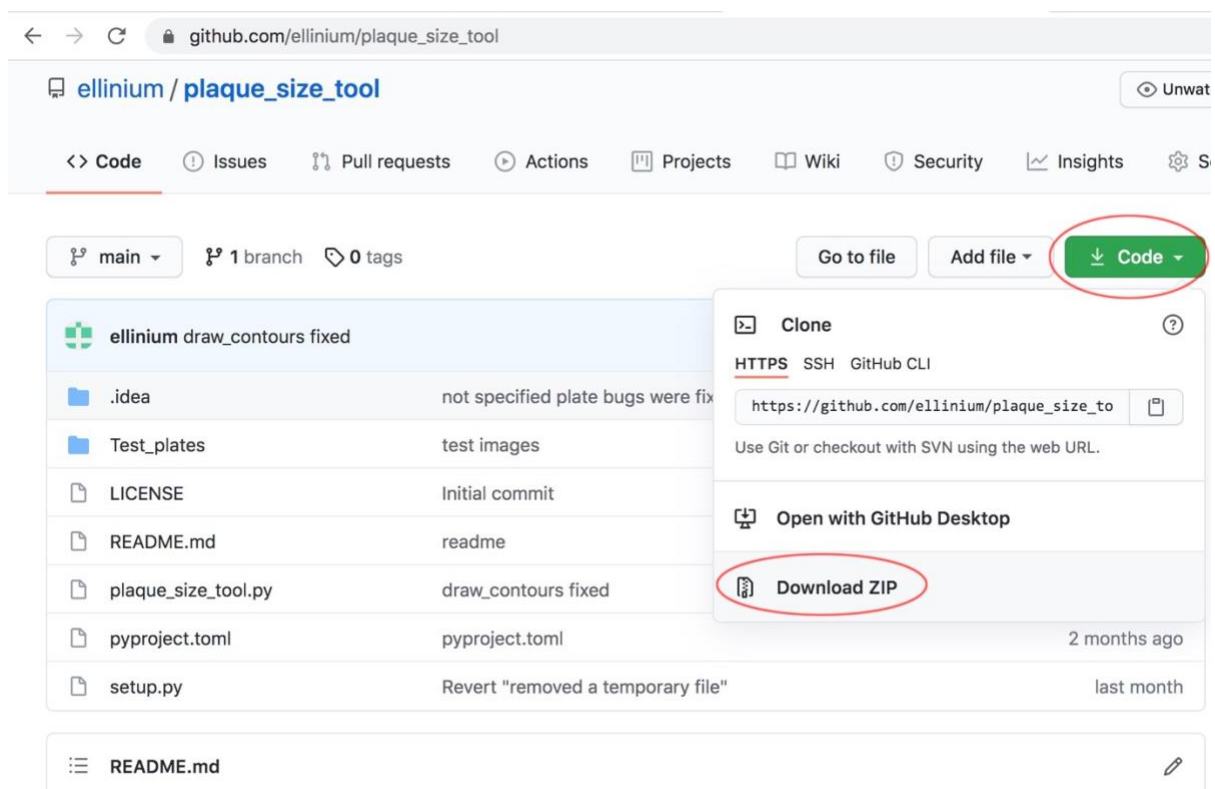

The archive called 'plaque\_size\_tool-main.zip' will be downloaded. Unpack the archive into the directory of your choice.

< OPTIONAL >: If you have already installed the program git, another option to download the files is to use the command:

```
git clone https://github.com/ellinium/plaque\_size\_tool <directory>
```

, where `<directory>` is a directory for Plaque Size Tool on a local machine.

### 3.2 Installation using pip

Next, within Terminal (macOS) or Command Prompt (Windows) navigate to the directory you unpacked the downloaded zip file into. For example, if you unpacked 'plaque\_size\_tool-

main.zip' into the '/home/plaque\_size\_tool/ plaque\_size\_tool-main' directory, navigate to this directory. To confirm you are in the directory containing the plaque size tool files, type 'ls' on Terminal (MacOS) or 'dir' on Command Prompt (Windows). You should see the following files listed:

```
Test_plates
LICENSE
plaque_size_tool.py
pyproject.toml
README.md
setup.py
```

Once in the directory containing plaque size tool, execute the following command which installs all required libraries for Plaque Size Tool:

```
pip3 install plaque-size-tool
```

If the pip3 command worked properly you should see something like this on your screen:

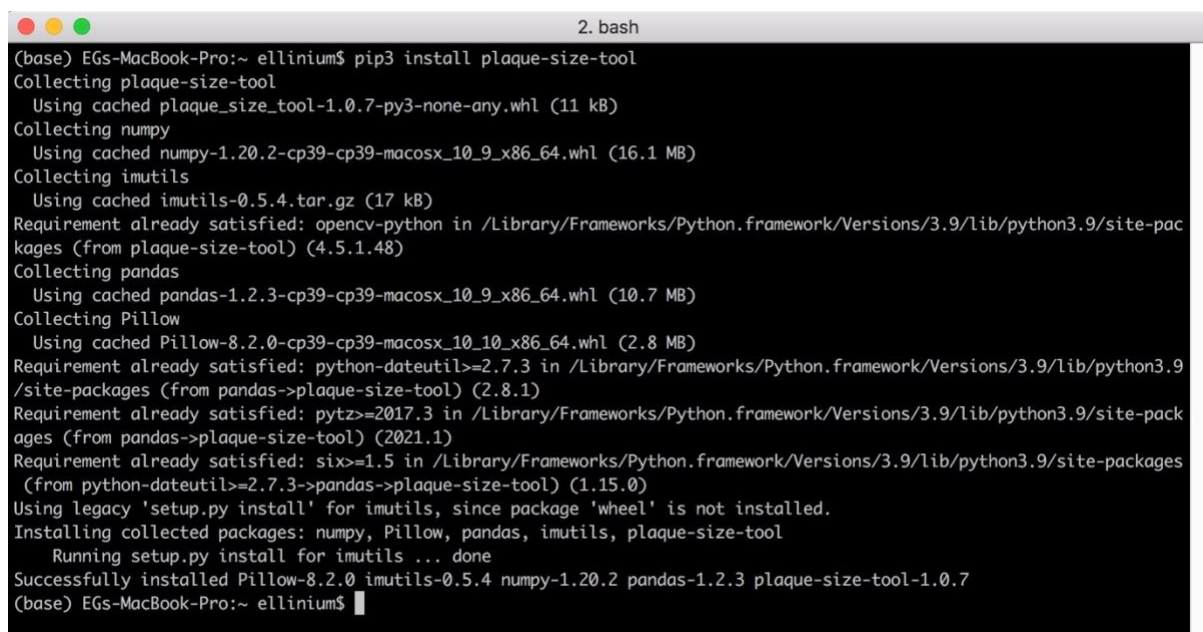

```
2. bash
(base) EGs-MacBook-Pro:~ ellinium$ pip3 install plaque-size-tool
Collecting plaque-size-tool
  Using cached plaque_size_tool-1.0.7-py3-none-any.whl (11 kB)
Collecting numpy
  Using cached numpy-1.20.2-cp39-cp39-macosx_10_9_x86_64.whl (16.1 MB)
Collecting imutils
  Using cached imutils-0.5.4.tar.gz (17 kB)
Requirement already satisfied: opencv-python in /Library/Frameworks/Python.framework/Versions/3.9/lib/python3.9/site-packages (from plaque-size-tool) (4.5.1.48)
Collecting pandas
  Using cached pandas-1.2.3-cp39-cp39-macosx_10_9_x86_64.whl (10.7 MB)
Collecting Pillow
  Using cached Pillow-8.2.0-cp39-cp39-macosx_10_10_x86_64.whl (2.8 MB)
Requirement already satisfied: python-dateutil>=2.7.3 in /Library/Frameworks/Python.framework/Versions/3.9/lib/python3.9/site-packages (from pandas->plaque-size-tool) (2.8.1)
Requirement already satisfied: pytz>=2017.3 in /Library/Frameworks/Python.framework/Versions/3.9/lib/python3.9/site-packages (from pandas->plaque-size-tool) (2021.1)
Requirement already satisfied: six>=1.5 in /Library/Frameworks/Python.framework/Versions/3.9/lib/python3.9/site-packages (from python-dateutil>=2.7.3->pandas->plaque-size-tool) (1.15.0)
Using legacy 'setup.py install' for imutils, since package 'wheel' is not installed.
Installing collected packages: numpy, Pillow, pandas, imutils, plaque-size-tool
  Running setup.py install for imutils ... done
Successfully installed Pillow-8.2.0 imutils-0.5.4 numpy-1.20.2 pandas-1.2.3 plaque-size-tool-1.0.7
(base) EGs-MacBook-Pro:~ ellinium$
```

MacOS and Windows use the same command for installation.

## 4. Plaque Size Tool usage

### 4.1 Plaque Size Tool usage options

The tool can be run on a single image file (TIF, TIFF, JPG, JPEG, PNG image formats are supported) or on a directory containing several image files. The output of Plaque Size Tool will be placed into a sub-directory called 'out' within the /plaque\_size\_tool-main directory.

You can execute the command to run Plaque Size Tool from the directory used in **Installation Step 3.1**. If your current directory differs, you need to include a full path to the tool (see below for examples).



### ***Input parameters:***

- i to process a single image file
- d to process a directory with image files
- p is an optional parameter for the Petri dish size in millimetres
- small an optional flag, is recommended to use when the plaques are less than 2.5 mm or images are of low resolution and size

## 4.2 Single File processing

MacOS: `python3 PATH_TO_PST/plaque_size_tool.py -i PATH_TO_THE_IMAGE_FILE [-p plate_size] [-small]`

Windows: `py PATH_TO_PST/plaque_size_tool.py -i PATH_TO_THE_IMAGE_FILE [-p plate_size] [-small]`

When the tool is executed from the directory Plaque Size Tool is installed into, the PATH\_TO\_PST can be omitted:

MacOS: `python3 plaque_size_tool.py -i PATH_TO_THE_IMAGE_FILE [-p plate_size] [-small]`

Windows: `py plaque_size_tool.py -i PATH_TO_THE_IMAGE_FILE [-p plate_size] [-small]`

### Examples

To use the following examples on Windows ‘python3’ is required to be replaced with ‘py’.

MacOS: `python3 plaque_size_tool.py -i Test_plates/large/Plate_4.tif`

- runs the tool on the file Plate\_4.tif located in the sub-directory Test\_plates/large/
- creates two files within the /out directory called: ‘data-green-Plate\_4.csv’ and ‘out\_Plate\_4.tif’
- all results within ‘data-green-Plate\_4.csv’ will be shown in pixels as the plate size is not specified.



MacOS: `python3 plaque_size_tool.py -i Test_plates/large/Plate_4.tif -p 90`

- runs the tool on the file Plate\_4.tif that has a plate size 90 mm.
- the results file 'data-green-Plate\_4.csv' will contain measurements in both mm and pixels.

```
EGs-MacBook-Pro:plaque_size_tool ellinium$ cd /Users/ellinium/Documents/PST/plaque_size_tool
EGs-MacBook-Pro:plaque_size_tool ellinium$ python3 plaque_size_tool.py -i Test_plates/large/Plate_4.tif
Processing Test_plates/large/Plate_4.tif
Process completed successfully
10 plaques were found

EGs-MacBook-Pro:plaque_size_tool ellinium$ python3 plaque_size_tool.py -i Test_plates/large/Plate_4.tif -p 90
Processing Test_plates/large/Plate_4.tif
Process completed successfully
10 plaques were found
```

MacOS: `python3 plaque_size_tool.py -i Test_plates/small/Plate_16.tif -p 90 -small`

- runs the tool on the file Plate\_16.tif that has small plaques. The results on a plate will be shown in mm.

```
2. bash
EGs-MacBook-Pro:plaque_size_tool ellinium$ python3 plaque_size_tool.py -i Test_plates/small/Plate_16.tif -p 90 -small
Processing Test_plates/small/Plate_16.tif
Process completed successfully
46 plaques were found
```

- If executing the tool while the current working directory (which can be checked with command 'pwd' on MacOS, 'cd' on Windows) is not '/plaque\_size\_tool-main' then the full path to the 'plaque\_size\_tool.py' file AND the image file must be specified, or an error will be shown because python3 cannot find the executable file and image file.

MacOS: `python3 /Users/paul/plaque_size_tool-main/plaque_size_tool.py -i /Users/paul/plaque_size_tool-main/Test_plates/large/Plate_4.tif`

## 4.3 Batch files processing

MacOS: `python3 PATH_TO_PST/plaque_size_tool.py -d PATH_TO_THE_DIRECTORY [-p plate_size] [-small]`

Windows: `py PATH_TO_PST/plaque_size_tool.py -d PATH_TO_THE_DIRECTORY [-p plate_size] [-small]`

### Example

MacOS: `python3 plaque_size_tool.py -d Test_plates/small -p 90 -small`

Windows: `py plaque_size_tool.py -d Test_plates/small -p 90 -small`

- runs the tool on the directory `Test_plates/small` that contains plates with small plaques ( $\leq 2.5$  mm). The results on a plate will be shown in mm.

```
EGs-MacBook-Pro:plaque_size_tool ellinium$ python3 plaque_size_tool.py -d Test_plates/small -p 90 -small
Processing Test_plates/small/Plate_1.tif
Process completed successfully
43 plaques were found

Processing Test_plates/small/Plate_9.tif
Process completed successfully
45 plaques were found

Processing Test_plates/small/Plate_11.tif
Process completed successfully
38 plaques were found

Processing Test_plates/small/Plate_13.tif
Process completed successfully
37 plaques were found

Processing Test_plates/small/Plate_16.tif
Process completed successfully
46 plaques were found
```

## 4.4 Output files

The tool produces two output files in the 'out' sub-directory that is created automatically:

**out\_<file\_name>** an image with identified non-overlapping plaques circled with a green line, where <file\_name> is the name of the original file.

If -p (plate size) parameter is specified, the results will be shown in mm. If -p is not specified, then the results are shown in pixels.

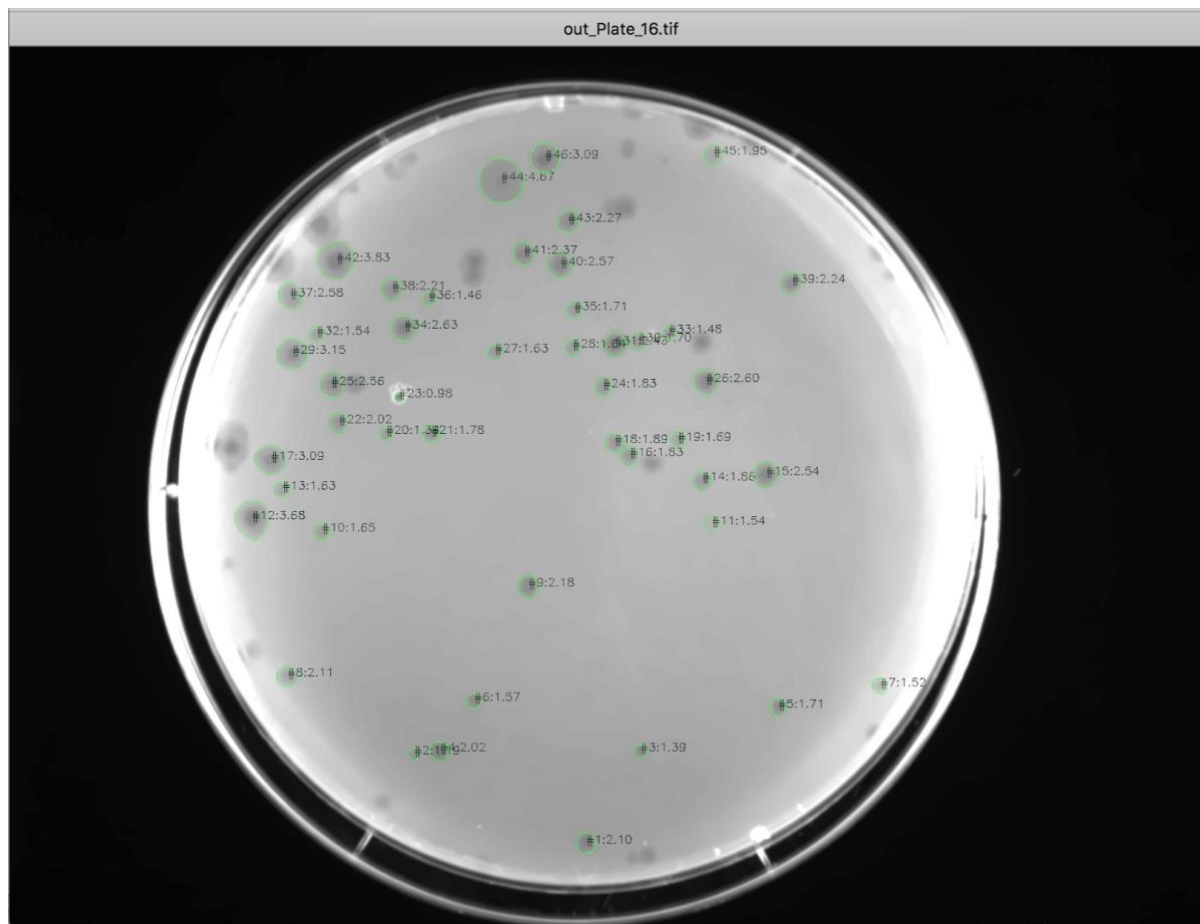

**data-green-`<file_name>`.csv**

a CSV file with detected plaques parameters:

INDEX\_COL - the ID of the plaque that corresponds to the ID on the output image

AREA\_PXL - Area of a plaque in square pixels

AREA\_MM2 - Area of a plaque in square millimetres if plate size is specified

DIAMETER\_PXL - Diameter of a plaque in pixels

DIAMETER\_MM - Diameter of a plaque in millimetres if plate size is specified

The screenshot shows a Microsoft Excel spreadsheet titled "data-green-Plate\_16". The spreadsheet has five columns: INDEX\_COL, AREA\_PXL, DIAMETER\_PXL, AREA\_MM2, and DIAMETER\_MM. The data is organized into 40 rows, with the first row (row 1) serving as the header. The INDEX\_COL column contains values from 1 to 40. The AREA\_PXL column contains values ranging from 233 to 1202.5. The DIAMETER\_PXL column contains values ranging from 1.11 to 3.93. The AREA\_MM2 column contains values ranging from 0.75 to 10.65. The DIAMETER\_MM column contains values ranging from 1.19 to 2.21. The spreadsheet is displayed in a standard Excel interface with the Home tab selected.

|    | A         | B        | C            | D        | E           | F | G | H | I | J | K | L |
|----|-----------|----------|--------------|----------|-------------|---|---|---|---|---|---|---|
| 1  | INDEX_COL | AREA_PXL | DIAMETER_PXL | AREA_MM2 | DIAMETER_MM |   |   |   |   |   |   |   |
| 2  | 1         | 533.5    | 26.06        | 3.45     | 2.1         |   |   |   |   |   |   |   |
| 3  | 2         | 172.5    | 14.82        | 1.11     | 1.19        |   |   |   |   |   |   |   |
| 4  | 3         | 233      | 17.22        | 1.51     | 1.39        |   |   |   |   |   |   |   |
| 5  | 4         | 499      | 25.21        | 3.22     | 2.02        |   |   |   |   |   |   |   |
| 6  | 5         | 356      | 21.29        | 2.3      | 1.71        |   |   |   |   |   |   |   |
| 7  | 6         | 298.5    | 19.5         | 1.93     | 1.57        |   |   |   |   |   |   |   |
| 8  | 7         | 280.5    | 18.9         | 1.81     | 1.52        |   |   |   |   |   |   |   |
| 9  | 8         | 540.5    | 26.23        | 3.49     | 2.11        |   |   |   |   |   |   |   |
| 10 | 9         | 579      | 27.15        | 3.74     | 2.18        |   |   |   |   |   |   |   |
| 11 | 10        | 331.5    | 20.54        | 2.14     | 1.65        |   |   |   |   |   |   |   |
| 12 | 11        | 288.5    | 19.17        | 1.86     | 1.54        |   |   |   |   |   |   |   |
| 13 | 12        | 1648     | 45.81        | 10.65    | 3.68        |   |   |   |   |   |   |   |
| 14 | 13        | 323      | 20.28        | 2.09     | 1.63        |   |   |   |   |   |   |   |
| 15 | 14        | 421      | 23.15        | 2.72     | 1.86        |   |   |   |   |   |   |   |
| 16 | 15        | 785.5    | 31.62        | 5.08     | 2.54        |   |   |   |   |   |   |   |
| 17 | 16        | 405      | 22.71        | 2.62     | 1.83        |   |   |   |   |   |   |   |
| 18 | 17        | 1160.5   | 38.44        | 7.5      | 3.09        |   |   |   |   |   |   |   |
| 19 | 18        | 435.5    | 23.55        | 2.81     | 1.89        |   |   |   |   |   |   |   |
| 20 | 19        | 348.5    | 21.06        | 2.25     | 1.69        |   |   |   |   |   |   |   |
| 21 | 20        | 233.5    | 17.24        | 1.51     | 1.39        |   |   |   |   |   |   |   |
| 22 | 21        | 386      | 22.17        | 2.49     | 1.78        |   |   |   |   |   |   |   |
| 23 | 22        | 498.5    | 25.19        | 3.22     | 2.02        |   |   |   |   |   |   |   |
| 24 | 23        | 115.5    | 12.13        | 0.75     | 0.98        |   |   |   |   |   |   |   |
| 25 | 24        | 409      | 22.82        | 2.64     | 1.83        |   |   |   |   |   |   |   |
| 26 | 25        | 794      | 31.8         | 5.13     | 2.56        |   |   |   |   |   |   |   |
| 27 | 26        | 822      | 32.35        | 5.31     | 2.6         |   |   |   |   |   |   |   |
| 28 | 27        | 322      | 20.25        | 2.08     | 1.63        |   |   |   |   |   |   |   |
| 29 | 28        | 327.5    | 20.42        | 2.12     | 1.64        |   |   |   |   |   |   |   |
| 30 | 29        | 1202.5   | 39.13        | 7.77     | 3.15        |   |   |   |   |   |   |   |
| 31 | 30        | 351      | 21.14        | 2.27     | 1.7         |   |   |   |   |   |   |   |
| 32 | 31        | 719      | 30.26        | 4.65     | 2.43        |   |   |   |   |   |   |   |
| 33 | 32        | 289.5    | 19.2         | 1.87     | 1.54        |   |   |   |   |   |   |   |
| 34 | 33        | 265.5    | 18.39        | 1.72     | 1.48        |   |   |   |   |   |   |   |
| 35 | 34        | 838.5    | 32.67        | 5.42     | 2.63        |   |   |   |   |   |   |   |
| 36 | 35        | 355      | 21.26        | 2.29     | 1.71        |   |   |   |   |   |   |   |
| 37 | 36        | 259      | 18.16        | 1.67     | 1.46        |   |   |   |   |   |   |   |
| 38 | 37        | 808      | 32.07        | 5.22     | 2.58        |   |   |   |   |   |   |   |
| 39 | 38        | 593.5    | 27.49        | 3.83     | 2.21        |   |   |   |   |   |   |   |
| 40 | 39        | 608      | 27.82        | 3.93     | 2.24        |   |   |   |   |   |   |   |
